# Supplementary material
Source: PubMed Central journal article supplement (PMC3251049)
Supplement: 1106134109_pnas.201106134SI.pdf [file 1106134109_pnas.201106134SI.pdf]

# Supporting Information

Milward et al. 10.1073/pnas.1106134109

## SI Methods

**Strains.** The strains used were wild-type N2 (Bristol) from the Caenorhabditis Genetics Center:

PR694, *tax-2* (p694);  
CX2948, *osm-9* (ky10);  
AX1031, *ocr-2* (ak47);  
CX2948, *tax-4* (p678);  
AX2157, *tax-2*(p694); *lin-15*(n765ts); dbEx[pflp-17::*tax-2* cDNA::Sl2gfp,*lin-15*(+)] (a kind gift from A. Bretscher, University of California, San Francisco, CA);  
AX2159, *tax-2*(p694); *lin-15*(n765ts); dbEx[pgcy-32::*tax-2* cDNA::Sl2gfp,*lin-15*(+)] (a kind gift from A. Bretscher);  
AX2161, *tax-2*(p694); *lin-15*(n765ts); dbEx[pflp-6::*tax-2* c+ DNA::Sl2gfp,*lin-15*(+)] (a kind gift from A. Bretscher);  
AX2178, *tax-2*(p694); *lin-15*(n765ts); dbEx[pgcy-8::*tax-2* cDNA::Sl2gfp,*lin-15*(+)] (a kind gift from A. Bretscher);  
PR680, *che-1*(p680);  
XA2262, dbEx[pgcy-32::*egl-1*, *pgcy-35*::gfp];  
AX2125, *ttx-1*(p767);  
AX2172, *ttx-1*(p767); dbEx[pgcy-33::*egl-1*,*punc-122*::dsRed];  
AX2051, dbEx[pgcy-33::*egl-1*, *punc-122*::dsRed].  
CX6241, *ocr-2*(ak47); kyEx687[*psra-6*::*ocr-2*, *punc-122*::gfp] (a kind gift from R. Gatsi, Friedrich Miescher Institute for Biomedical Research, Basel, Switzerland);  
CX6382, *ocr-2*(ak47); kyEx693[*psrh-220*::*ocr-2*, *punc-122*::gfp] (a kind gift from R. Gatsi);  
CX6237, *ocr-2*(ak47); kyEx686[*psrh-142*::*ocr-2*, *punc-122*::gfp] (a kind gift from R. Gatsi);  
CX6235, *ocr-2*(ak47); kyEx685[*podr-10*::*ocr-2*, *punc-122*::gfp] (a kind gift from R. Gatsi);  
CB1372, *daf-7*(e1372);  
DA2202, *daf-7*(e1372); adEx2202[*pgpa-4*::*daf-7*,*rol-6p*::gfp] (a kind gift from Y.-J. You, Virginia Commonwealth University Medical Center, Richmond, VA, and L. Avery, University of Texas Southwestern Medical Center, Dallas, TX);  
CB1370, *daf-2*(e1370);  
CF1038, *daf-16*(mu86);  
GR1309, *daf-16*(mgDf47);*daf-2*(e1370);  
TJ1052, *age-1*(hx546);  
*daf-16* (mu86);Ex[*pmyo-3*::gfp,*daf-16*, *punc122*::gfp]; *daf-16* (mu86);Ex[*pges-1*::gfp, *daf-16*, *punc-122*::gfp]; *daf-16*(mu86);Ex[*punc-119*::gfp, *daf-16*,*punc-122*::gfp];  
*age-1*(hx546); Ex[*punc-119*::*age-1*,*pges-1*::gfp] (a kind gift from I. Mori, Nagoya University, Nagoya, Japan);  
*age-1*(hx546);Ex[*posm-6*::*age-1*,*pges-1*::gfp] (a kind gift from I. Mori);  
FK234, *egl-4*(ks62) (a kind gift from Y.-J. You and L. Avery);  
DA2143, *egl-4*(ks62); adEx2143[*ptax-4*::*egl-4*,*prol-6*::gfp] (a kind gift from Y.-J. You and L. Avery);  
DA2149, *egl-4*(ks62);adEx2149[*podr-3*::*egl-4*,*prol-6*::gfp] (a kind gift from Y.-J. You and L. Avery);  
DA2186, *egl-4*(ks62);adEx2186[*pgcy-32*::*egl-4*,*prol-6*::gfp] (a kind gift from Y.-J. You and L. Avery);  
AX204, *npr-1*(ad609);  
AX1295, *gcy-35*(ok769);  
AX1230, *gcy-35*(ok769); *npr-1*(ad609);dbEx[*pgcy-32*::*gcy-35*, *punc122*::gfp]; AX1744, *npr-4*(tm1782) ox6;  
AX1775, *npr-5*(ok1583) ox6;

AX1412, *flp-21*(pk1601);*flp-18*(db99);  
*npr-1*(ad609); *lin-15*(n765ts);dbEx[*pnp-1*::*npr-1*-gfp];  
CX9586, *npr-1*(ad609);kyEx[*pgcy-32*::*npr-1*];  
CX9645, *npr-1*(ad609); kyEx[*pncs-1*::*npr-1*];  
AX1823, *npr-1*(ad609);*lin-15*(n765ts);dbEx[*pgcy-7*::*npr-1*-gfp];  
AX1820, *npr-1*(ad609);*lin-15*(n765ts);dbEx[*pgcy-5*::*npr-1*-gfp];  
AX2311, *npr-1*(ad609) *lite-1* (*ce314*);dbEx[*pgcy-32*::*channelrhodopsin*];  
AX2415, *che-1*(p680);*ttx-1*(p767);Ex[*pgcy-33*::*egl-1* *punc122*::dsRed].

**Transgenic Strain Construction.** For *daf-16* rescue, *pmyo-3*::gfp, *daf-16*, *pges-1*::gfp, *daf-16*, or *punc-119*::gfp, *daf-16* constructs (1) were injected at 30 ng/μL into CF1038 *daf-16* (mu86) with *punc-122*::gfp (CCGFP) as a coinjection marker. Three independent rescue lines for each construct were used. The RMG rescue of *npr-1* was made by coinjecting *pncs-1*::*nCre* and *pflp-21*::*LoxStopLox*::*npr-1* (2) together with pJMZ *lin-15* marker into *npr-1*(ad609); *lin-15* (n765ts). Two independent lines were used. For ASH rescue of *npr-1*, *psra-6*::*npr-1* (*npr-1* genomic DNA a kind gift from Marina Ezcurra, Medical Research Council, Laboratory of Molecular Biology, Cambridge, UK) was injected at 20 ng/μL with pJMZ *lin-15* coinjection marker into *npr-1*(ad609), *lin-15*(n765ts). Two independent lines were assayed.

The *gcy-5* and *gcy-7* promoters (a kind gift from Yoshinori Tanizawa, Medical Research Council, Laboratory of Molecular Biology, Cambridge, UK) were placed upstream of *npr-1* cDNA with polycistronic GFP, to follow expression, and injected *punc-122*::gfp (CCGFP) as a coinjection marker into *npr-1* (ad609). Three independent lines were analyzed.

**Channelrhodopsin Expression and Activation.** Channelrhodopsin that was C-terminally tagged with mCitrine was expressed in the *npr-1* (*ad609*) *lite-1* (*ce314*) background from the *gcy-32* promoter. Worms were grown on plates supplemented with 50 μL of 5 mM all-transretinal (Sigma), dissolved in ethanol. Control animals were grown on plates supplemented with the same amount of ethanol. For assays, 10–13 adult hermaphrodites were transferred to low peptone nematode growth medium plates seeded with 30 μL of *Escherichia coli* OP50 2 d before assay, and left foraging for 1 h. Ten minutes before the recording, the plate was transferred into a Perspex chamber and kept at 11% O<sub>2</sub> (balance N<sub>2</sub>). Animals were filmed using dim white light 3 min before and 3 min after the stimulation. For stimulation, the animals were exposed to blue light (13 mW/cm<sup>2</sup>) for 3 min.

**Analysis of Behavioral Characteristics.** Recorded worms were tracked using DIAS software (Solltech). Worm object paths were generated. For each worm object, the centroid *x* and *y* coordinates, maximum length, mean width, perimeter, and roundness were extracted and these parameters were used in a custom-written program in MATLAB (Mathworks) to calculate speed, reversal rate per animal per minute, proportion of worms leaving after entering border area, border arrival rate per animal per minute and the average time worms spend at the border. Immobile and merged objects were excluded in the analysis. Further details are available on request.

1. Libina N, Berman JR, Kenyon C (2003) Tissue-specific activities of *C. elegans* DAF-16 in the regulation of lifespan. *Cell* 115:489–502.

2. Macosko EZ, et al. (2009) A hub-and-spoke circuit drives pheromone attraction and social behaviour in *C. elegans*. *Nature* 458:1171–1175.
